# Supplementary material for: Inhibition of protein kinase C promotes dengue virus replication
Source: Springer Nature journal article supplement (doi:10.1186/s12985-016-0494-6), 2016-03-01
Supplement: MOESM1 [file 9770584]

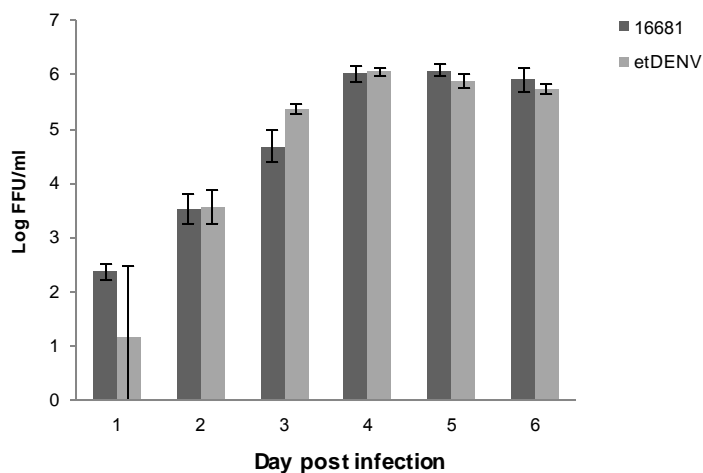

Supplementary Figure 1: Viral kinetics of recombinant DENV expressing His-FLAG tagged NS5 (etDENV) and the wild type DENV2 16681 (16681) on day 1 to day 6. The viral titers were determined by FFA using BHK-21 as host cells. The graphs show a representative experiment. Error bars represent S.D. from a triplicated experiments.
